# Supplementary material for: Not just a fluidifying effect: omega-3 phospholipids induce formation of non-lamellar structures in biomembranes
Source: Royal Society of Chemistry journal article supplement (doi:10.1039/d0sm01549k), 2020-01-01
Supplement: d0sm01549k1.pdf [file d0sm01549k1.pdf]

## Supporting information

to

### **Not just a fluidifying effect: omega-3 phospholipids induce formation of non-lamellar structures in biomembranes**

Augusta de Santis,<sup>a,b</sup> Giuseppe Vitiello,<sup>b,c</sup> Marie-Sousai Appavou,<sup>d</sup> Ernesto Scoppola,<sup>e</sup> Giovanna Fragneto,<sup>f</sup> Lester C. Barnsley,<sup>d,g</sup> Luke A. Clifton,<sup>h</sup> Maria Francesca Ottaviani,<sup>i</sup> Luigi Paduano,<sup>a,b</sup> Irene Russo Krauss,<sup>\*,a,b</sup> Gerardino D'Errico<sup>\*,a,b</sup>

<sup>a</sup> Department of Chemical Sciences, University of Naples Federico II, Naples, Italy.

<sup>b</sup> CSGI (Consorzio per lo Sviluppo dei Sistemi a Grande Interfase), Florence, Italy.

<sup>c</sup> Department of Chemical, Materials and Production Engineering, University of Naples Federico II, Naples, Italy.

<sup>d</sup> Jülich Centre for Neutron Science (JCNS) at Heinz Maier-Leibnitz Zentrum (MLZ), Forschungszentrum Jülich GmbH, Garching, Germany

<sup>e</sup> Max Planck Institut für Kolloid und Grenzflächenforschung, Potsdam, Germany

<sup>f</sup> Institut Laue-Langevin (ILL) Grenoble, France

<sup>g</sup> Current address Australian Synchrotron, ANSTO, Clayton, Australia

<sup>h</sup> ISIS Facility, Science and Technology Facilities Council, Rutherford Appleton Laboratory, Harwell Oxford, Didcot OX11 0QX, United Kingdom

<sup>i</sup> Department of Pure and Applied Sciences, University of Urbino, Urbino, Italy

\* To whom correspondence should be addressed.

Irene Russo Krauss, Tel: +39 081674227; Email: [irene.russokrauss@unina.it](mailto:irene.russokrauss@unina.it),

Gerardino D'Errico, Tel: +39 081674245; Email: [gderrico@unina.it](mailto:gderrico@unina.it)

**Table S1** Scattering Length Densities (*SLDs*) and Molecular Volumes (*V*) used as input values for the Neutron Reflectivity fitting procedure.

| <b>Molecule</b>                | <b>Chemical Formula</b>                           | <b><i>SLD</i></b><br><b>[10<sup>-6</sup> Å<sup>-2</sup>]</b> | <b><i>V</i></b><br><b>[Å<sup>3</sup>]</b> |
|--------------------------------|---------------------------------------------------|--------------------------------------------------------------|-------------------------------------------|
| <b>Heavy Water</b>             | D <sub>2</sub> O                                  | 6.3752                                                       | 30.0428                                   |
| <b>Light Water</b>             | H <sub>2</sub> O                                  | -0.5594                                                      | 29.9757                                   |
| <b>POPC (Tail)</b>             | C <sub>32</sub> H <sub>64</sub>                   | -0.2899                                                      | 919.614                                   |
| <b>POPC (Headgroup)</b>        | C <sub>10</sub> H <sub>18</sub> PO <sub>8</sub> N | 1.8652                                                       | 322.100                                   |
| <b>22:6-22:6PC (Tail)</b>      | C <sub>42</sub> H <sub>62</sub>                   | 0.6543                                                       | 722.940                                   |
| <b>22:6-22:6PC (Headgroup)</b> | C <sub>10</sub> H <sub>18</sub> PO <sub>8</sub> N | 1.8652                                                       | 322.100                                   |
| <b>Silicon</b>                 | Si                                                | 2.0754                                                       | 20.000                                    |
| <b>Silicon Oxide</b>           | SiO <sub>2</sub>                                  | 3.2698                                                       | 48.200                                    |

**Table S2** Correlation time  $\tau$ , order parameter  $S$  and coupling constant  $\langle A \rangle$  for 5- and 14-PCSL as derived from EPR spectra simulation. Errors are within 1%.

| $x_{22:6-22:6PC}$ | $\tau$ (ns) |         | $S$    |         | $\langle A \rangle$ (G) |         |
|-------------------|-------------|---------|--------|---------|-------------------------|---------|
|                   | 5-PCSL      | 14-PCSL | 5-PCSL | 14-PCSL | 5-PCSL                  | 14-PCSL |
| <b>0</b>          | 8.4         | 1.39    | 0.42   | 0.15    | 14.5                    | 14.17   |
| <b>0.2</b>        | 7.44        | 1.22    | 0.42   | 0.15    | 14.43                   | 14.16   |
| <b>0.4</b>        | 7.34        | 1.13    | 0.418  | 0.15    | 14.43                   | 14.15   |
| <b>0.5</b>        | 7.25        | 0.75    | 0.415  | 0.145   | 14.43                   | 14.41   |
| <b>0.6</b>        | 6.23        | 0.38    | 0.4    | 0.14    | 14.47                   | 14.55   |
| <b>0.8</b>        | 5.56        | 0.37    | 0.403  | 0.13    | 14.48                   | 14.55   |
| <b>1.0</b>        | 5.45        | 0.21    | 0.403  | 0.105   | 14.49                   | 14.67   |

**Table S3** Correlation time  $\tau$ , order parameter  $S$  and coupling constant  $\langle A \rangle$  as derived from EPR spectra simulation for different spin labels and two different POPC/22:6-22:6PC compositions. Errors are within 1%.

| $x_{22:6-22:6PC}$ | $\tau$ (ns) |      | $S$  |       | $\langle A \rangle$ (G) |       |
|-------------------|-------------|------|------|-------|-------------------------|-------|
|                   | 0.2         | 0.8  | 0.2  | 0.8   | 0.2                     | 0.8   |
| <b>5-PCSL</b>     | 7.44        | 5.56 | 0.42 | 0.403 | 14.43                   | 14.49 |
| <b>7-PCSL</b>     | 4.2         | 3.1  | 0.41 | 0.39  | 14.43                   | 14.3  |
| <b>10-PCSL</b>    | 2.65        | 1.7  | 0.33 | 0.29  | 14.23                   | 14.23 |
| <b>14-PCSL</b>    | 1.22        | 0.37 | 0.15 | 0.13  | 14.16                   | 14.55 |

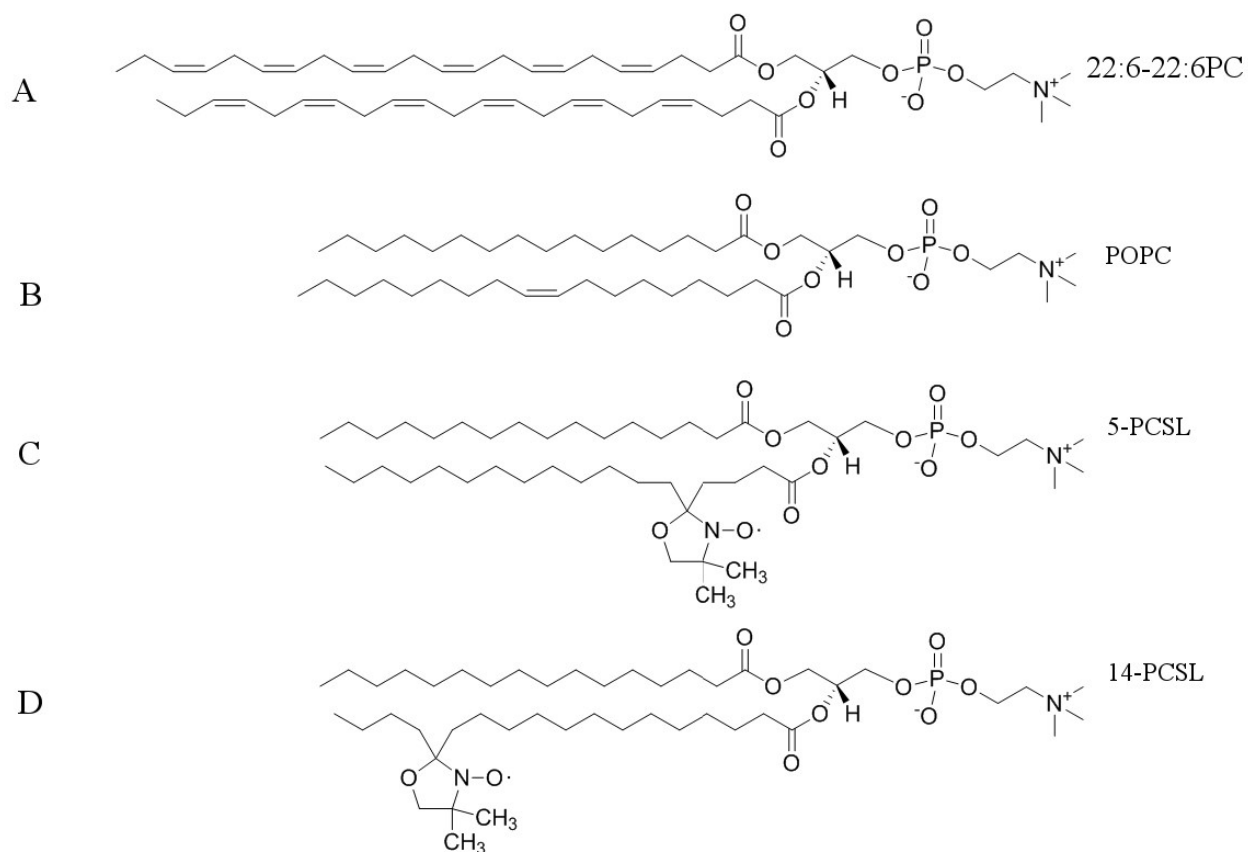

**Fig. S1** Chemical structure of the phospholipid employed in the study: 1,2-didocosahexaenoyl-*sn*-glycero-3-phosphocholine (22:6-22:6PC) (A), 1-palmitoyl-2-oleoyl-*sn*-glycero-3-phosphocholine (POPC) (B), 5-PCSL (C) and 14-PCSL (D).

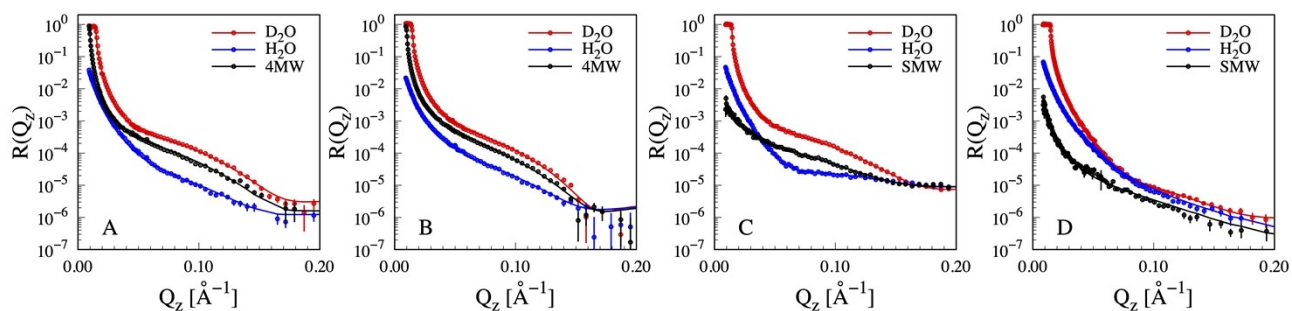

**Fig. S2** Experimental data and best fitting curves in D<sub>2</sub>O (red), H<sub>2</sub>O (blue) and either 4MW (black in panel A and B) or SMW (black in panel C and D) for lipid systems: A) POPC, B) POPC/22:6-22:6PC  $x_{22:6-22:6PC} = 0.2$ , C) POPC/22:6-22:6PC  $x_{22:6-22:6PC} = 0.4$ , D) POPC/22:6-22:6PC  $x_{22:6-22:6PC} = 0.8$  respectively.

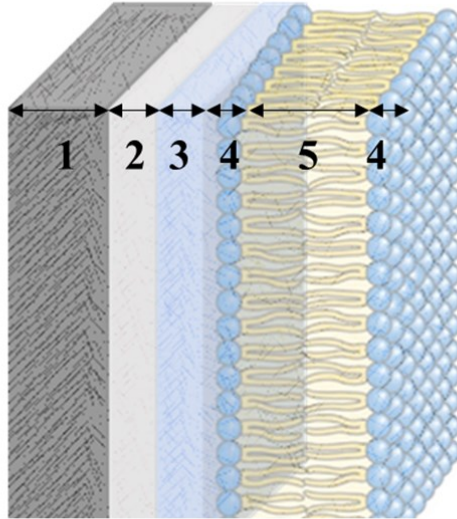

**Fig. S3** Schematic representation of the model used for fitting of NR profiles with all chemical components explicitly shown: 1) Si block; 2) SiO<sub>2</sub> layer; 3) water, 4) headgroups, 5) tails of the lipids forming the bilayer.

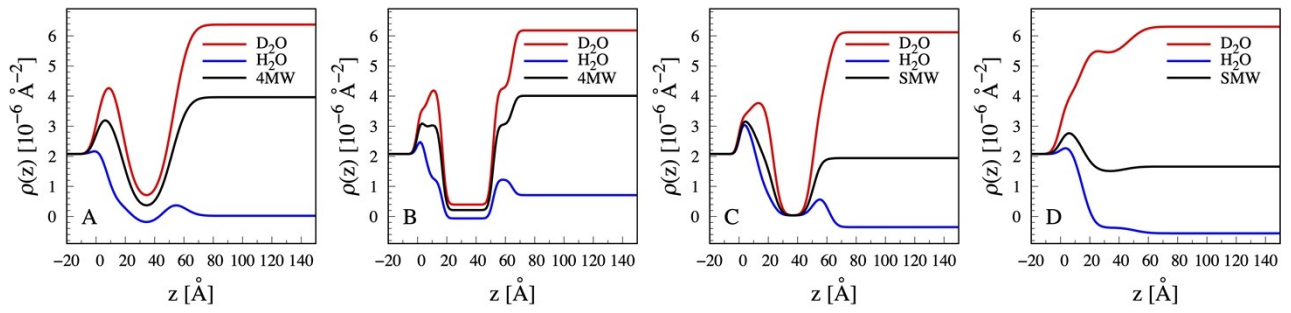

**Fig. S4** SLD profiles corresponding to best fit of Neutron Reflectivity data in D<sub>2</sub>O (red), H<sub>2</sub>O (blue) and either 4MW (black in panel A and B) or SMW (black in panel C and D) for lipid systems: A) POPC, B) POPC/22:6-22:6PC  $x_{22:6-22:6PC} = 0.2$ , C) POPC/22:6-22:6PC  $x_{22:6-22:6PC} = 0.4$ , D) POPC/22:6-22:6PC  $x_{22:6-22:6PC} = 0.8$ , respectively.



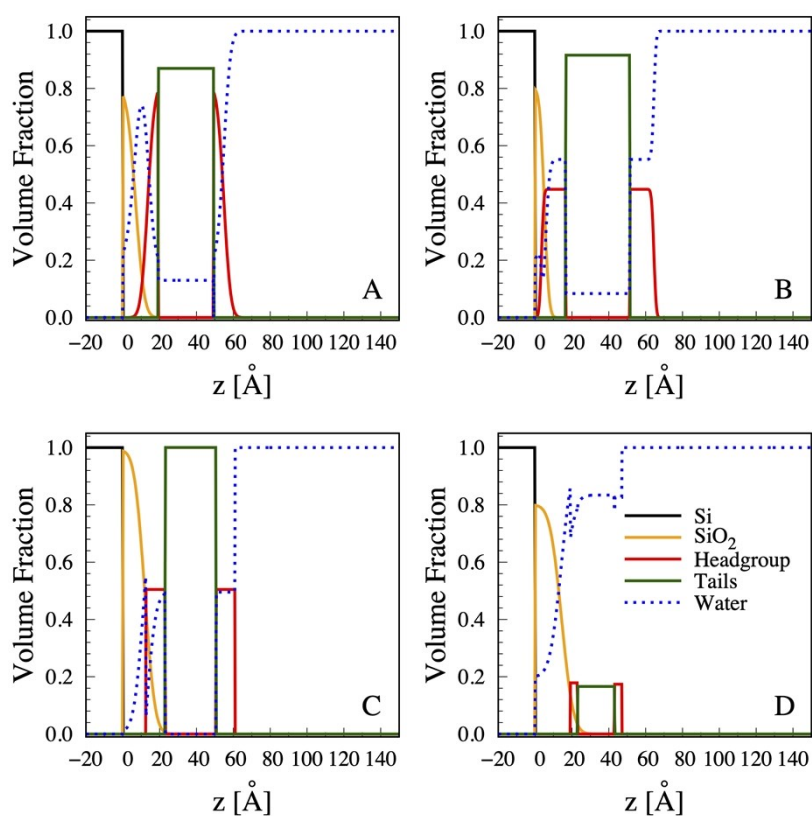

**Fig. S5** Deconvoluted volume fraction distribution profiles for Silicon (black), SiO<sub>2</sub> (orange), lipid headgroup (red), lipid tails (green) and water (dashed blue line) for lipid systems: A) POPC, B) POPC/22:6-22:6PC  $x_{22:6-22:6PC} = 0.2$ , C) POPC/22:6-22:6PC  $x_{22:6-22:6PC} = 0.4$  and D) POPC/22:6-22:6PC  $x_{22:6-22:6PC} = 0.8$ , respectively.

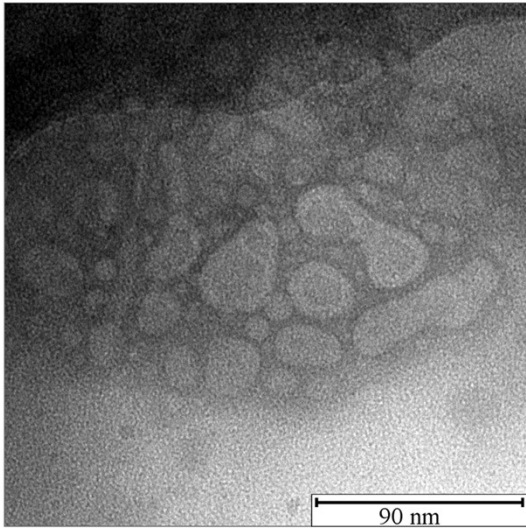

A

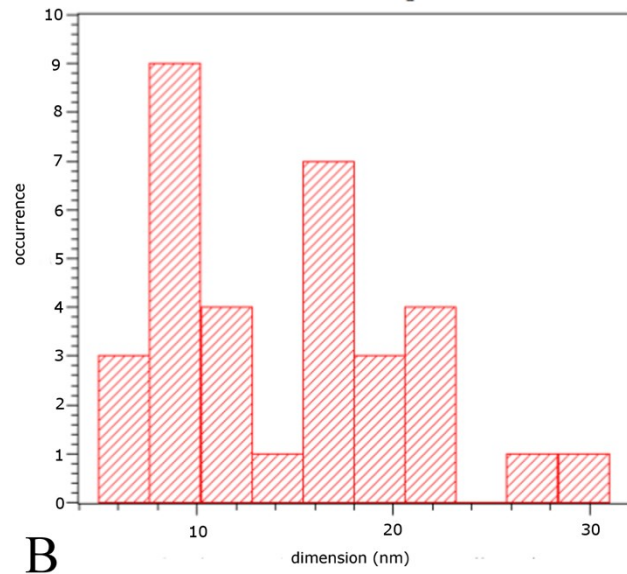

B

**Fig. S6** Cryo-TEM micrograph of POPC/22:6-22:6PC  $x_{22:6-22:6PC} = 0.8$  (A) and particle diameter distribution (B).

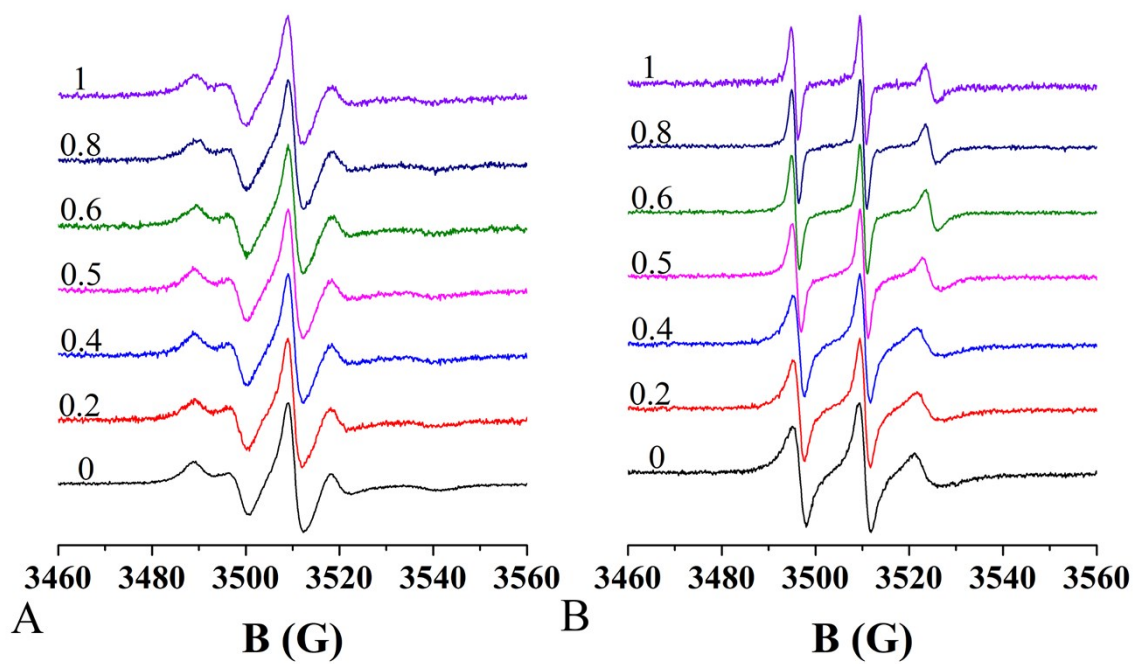

**Fig. S7** EPR spectra of 5-PCSL (A) and 14-PCSL (B), in POPC/22:6-22:6PC systems with  $X_{22:6-22:6PC}$  ranging from 0 to 1.

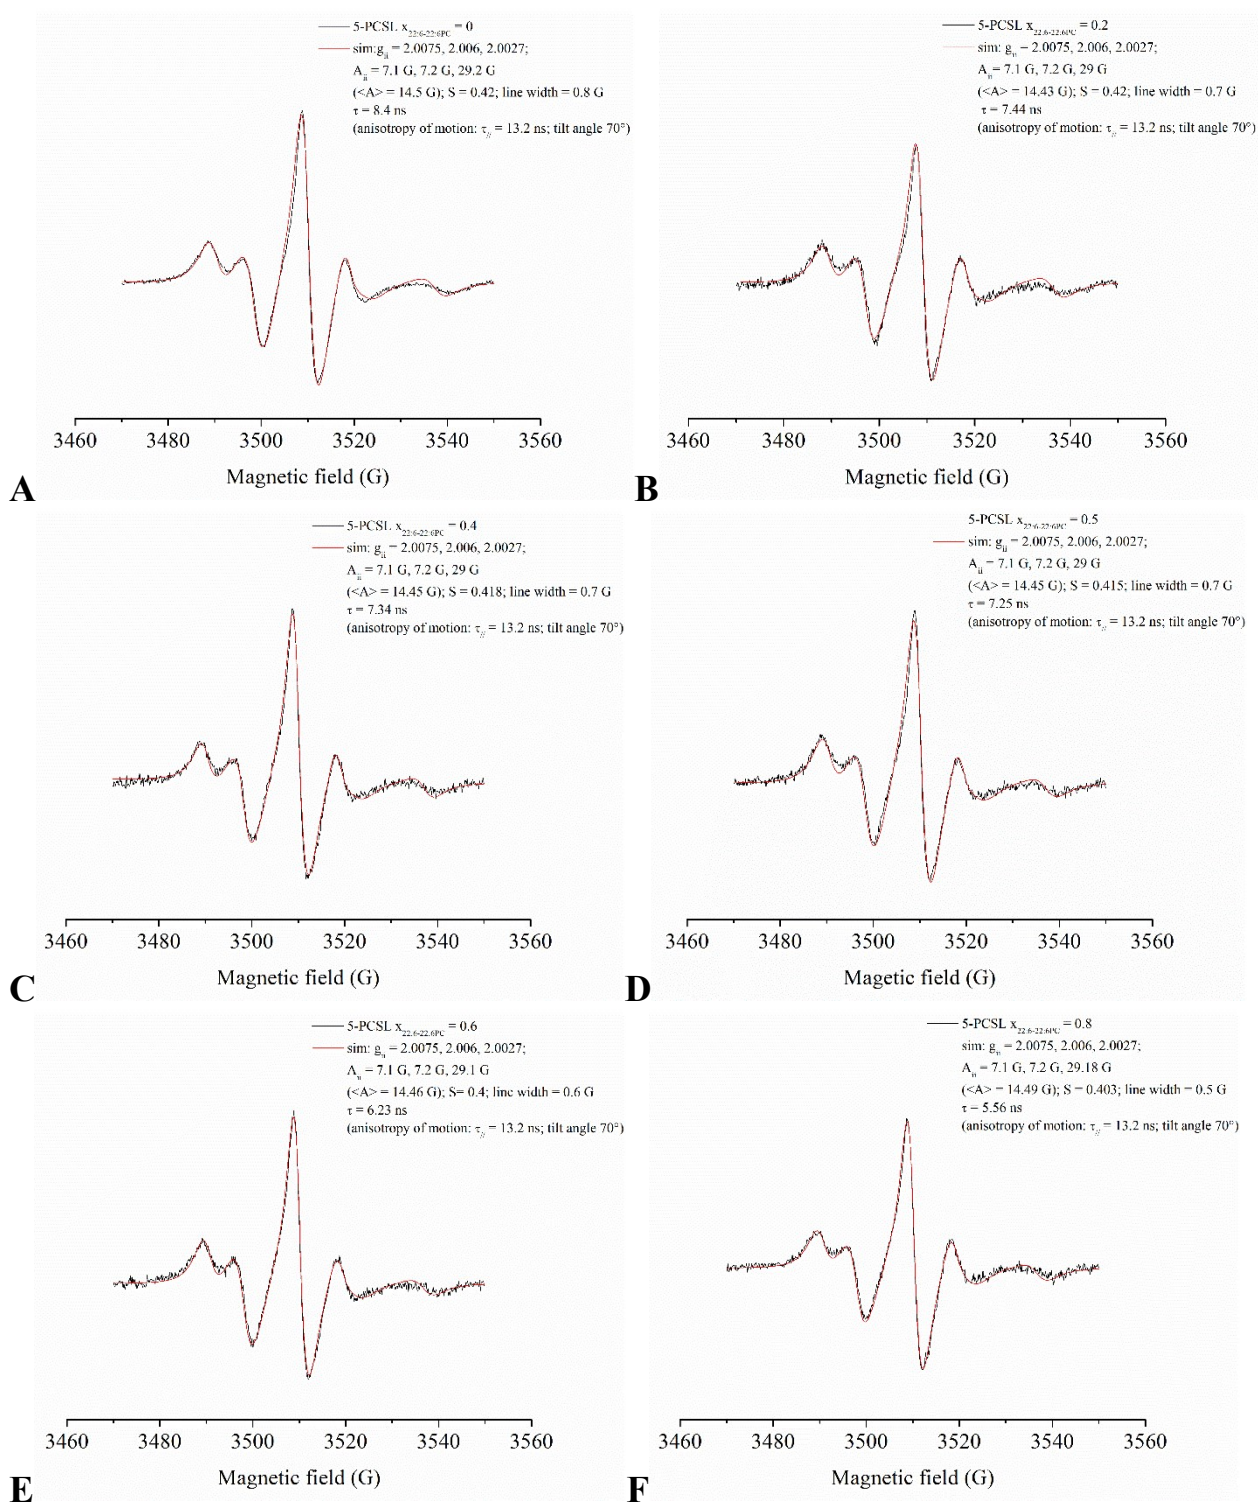

**Fig. S8** Comparison between simulated (red) and experimental (black) EPR spectra of 5-PCSL in POPC/22:6-22:6PC systems with  $x_{22:6-22:6PC}$  ranging from 0 to 0.8.

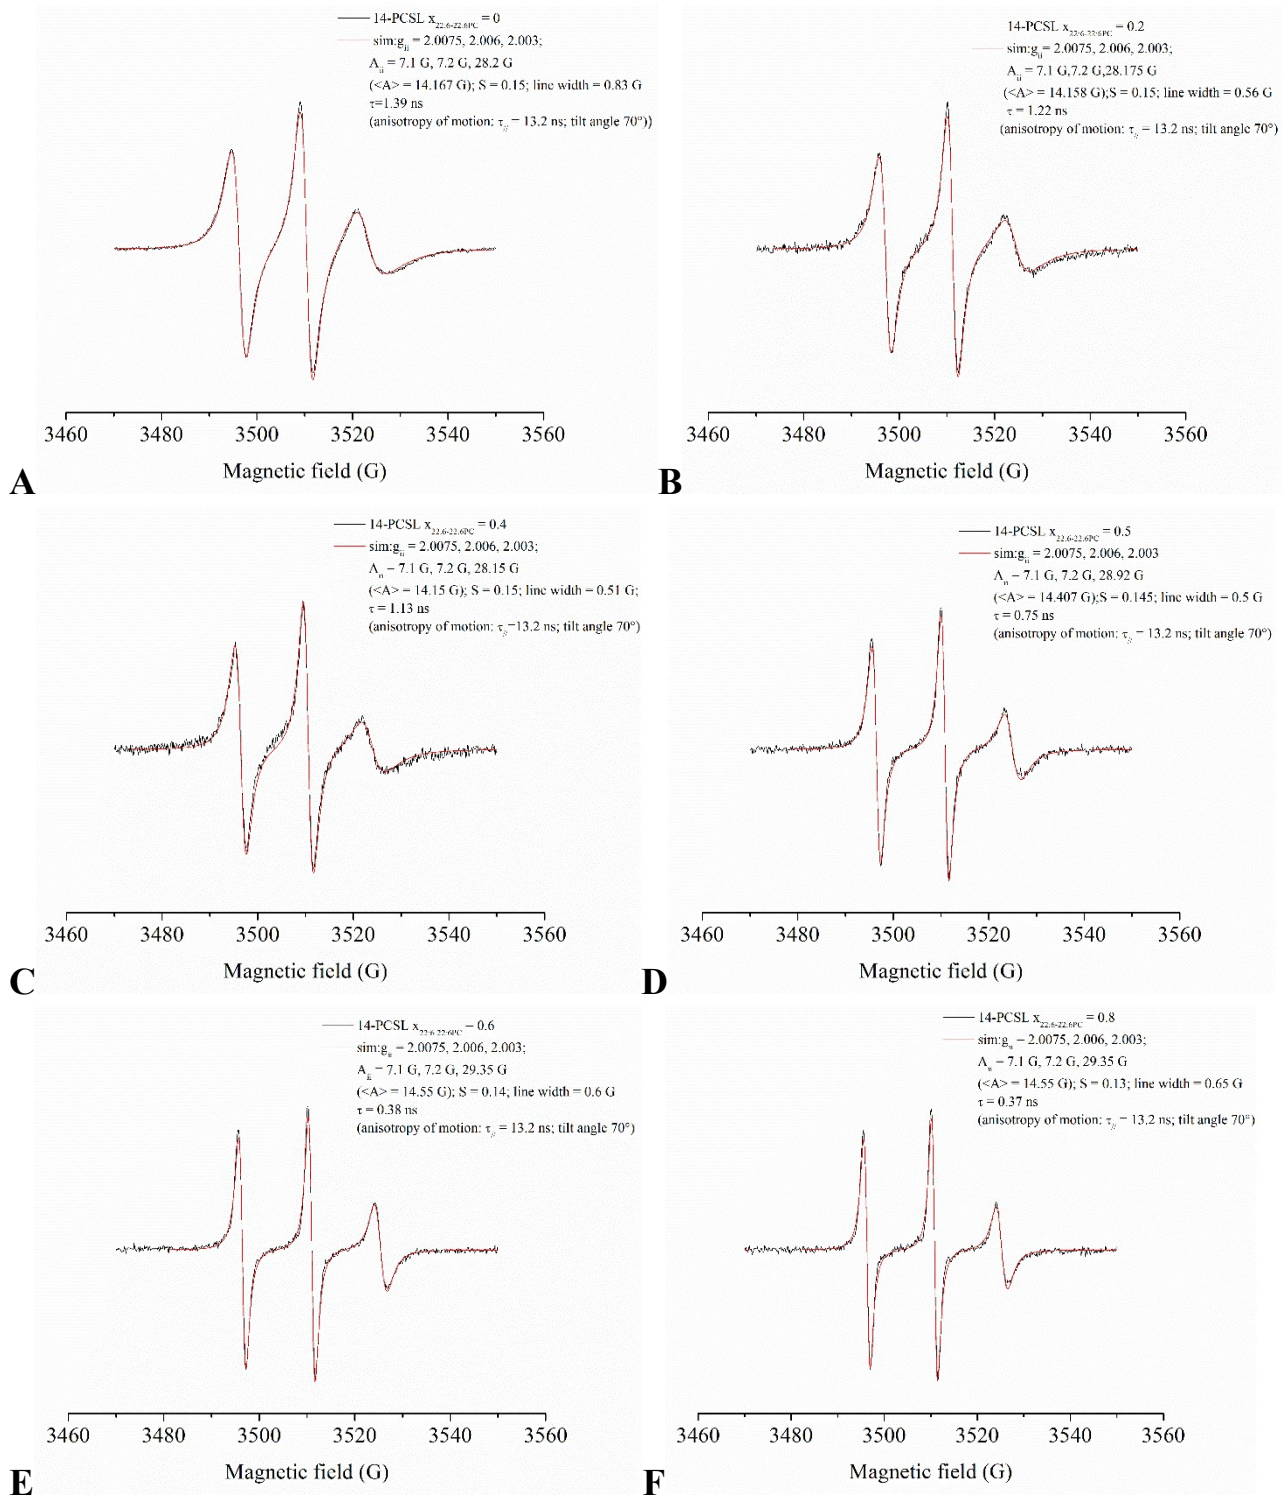

**Fig. S9** Comparison between simulated (red) and experimental (black) EPR spectra of 14-PCSL in POPC/22:6-22:6PC systems with  $x_{22:6-22:6PC}$  ranging from 0 to 0.8.
